# Supplementary material for: Comparative Pharmacokinetics and Bioavailability of Three Ephedrines in Rat after Oral Administration of Unprocessed and Honey‐Fried Ephedra Extract by Response Surface Experimental Design
Source: Hindawi journal article supplement (doi:10.1155/2017/2802193), 2017-01-01
Supplement: f1 [file 2802193.f1.pdf]

### **Information on biosynthesis of ephedrine or pseudoephedrine by ephedra:**

Biosynthesis of ephedrine and pseudoephedrine by ephedra begins with L-phenylalanine (Phe). Phe is the initial precursor of ephedrine and pseudoephedrine and catalyzed by phenylalanine ammonia lyase (PAL) [S1]. Recent studies suggest that there are at least two possible pathways of Phe side chain- shortening in ephedra benzoic acid biosynthesis:  $\beta$ -oxidative CoA-dependent and non- $\beta$ -oxidative CoA-independent routes [S2, S3]. A proposed biosynthesis pathway for the biosynthesis of ephedrine and pseudoephedrine in ephedra is described in Figure S1 [S4-S8]. Figure and references for details can be found in supporting information.

In the  $\beta$ -oxidative CoA-dependent pathway, the first step is the formation of cinnamoyl-CoA, which is catalyzed by cinnamate: CoA ligase. Subsequently, a hydratase converts cinnamoyl-CoA to 3-hydroxy-3-phenylpropanoyl-CoA, and a dehydrogenase catalyzes the 3-hydroxy-3-phenylpropanoyl-CoA into 3-oxo-3-phenylpropanoyl-CoA. In the end, 3-ketoacyl-CoA thiolase catalyzes the formation of benzoyl-CoA (Figure S1) [S6-S8].

In the non- $\beta$ -oxidative CoA-independent routes, cinnamic acid was converted to 3-hydroxy-3-phenylpropionic-acid under the catalysis of a hydratase. After retro-aldol cleavaging, 3-hydroxy-3-phenylpropionic-acid was converted to benzaldehyde. Subsequently, two different dehydrogenase (benzaldehyde dehydrogenase and aldehyde oxidases 4) catalyze the formation of benzoic acid from benzaldehyde. After undergoing condensation with pyruvate, benzaldehyde, benzoyl-CoA and/or benzoic acid was catalyzed by a ThDP-dependent carbonylase to form 1-phenylpropane-1,2-dione. Transamination of 1-Phenylpropane-1,2-dione yields (S)-cathinone, which is reduced to (1S,2S)-pseudonorephedrine and (1R,2S)-norephedrine. In the end, N-Methylation of these two ephedrines completes the pathway in ephedra (Figure S1) [S4, S5, S7, S8].

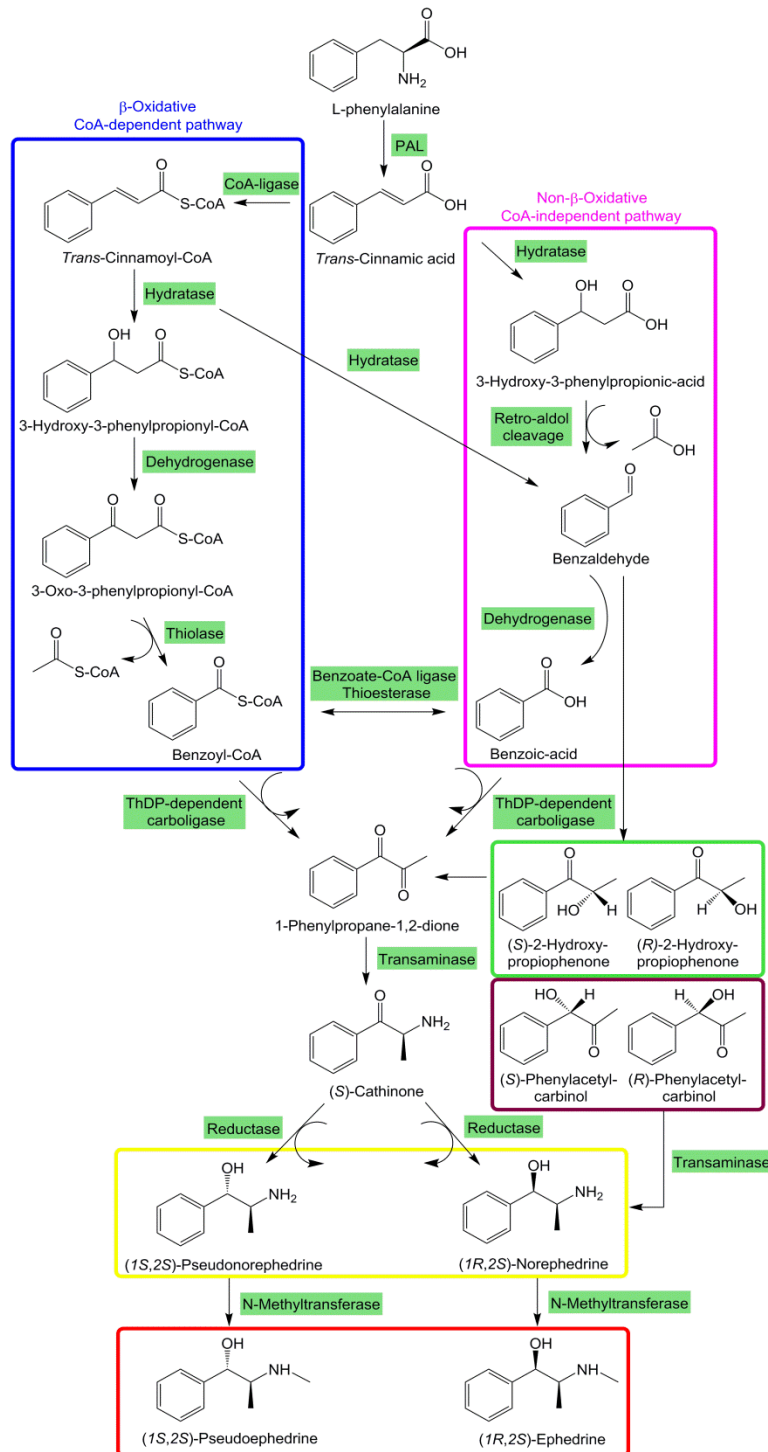

FIGURE S1. Proposed pathways for the biosynthesis of ephedrine and pseudoephedrine in ephedra. A  $\beta$ -oxidative CoA-dependent pathway of L-phenylalanine side chain-shortening is shown in blue boxes, however a non- $\beta$ -oxidative CoA-independent pathway is shown in pink boxes. Abbreviations: PAL, phenylalanine ammonia lyase; CoA, Coenzyme A; ThDP, thiamine diphosphate.

## References

- [S1]. T. Okada, M. Mikage, and S. Sekita. "Molecular characterization of the phenylalanine ammonia-lyase from *Ephedra sinica*," *Biological & Pharmaceutical Bulletin*, vol. 31, no. 12, pp. 2194-2199.
- [S2]. J. Boatright, F. Negre, X. Chen, et al. "Understanding in Vivo Benzenoid Metabolism in *Petunia* Petal Tissue," *Plant Physiology*, vol. 135, no. 4, pp. 1993-2011.
- [S3]. A.V. Qualley, J.R. Widhalm, F. Adebessin, C.M. Kish, and N. Dudareva. "Completion of the core  $\beta$ -oxidative pathway of benzoic acid biosynthesis in plants," *Proceedings of the National Academy of Science*, vol. 109, no. 40, p. 16383.
- [S4]. P.J. Facchini. "ALKALOID BIOSYNTHESIS IN PLANTS: Biochemistry, Cell Biology, Molecular Regulation, and Metabolic Engineering Applications," *Annual Review of Plant Biology*, vol. 52, no. 52, p. 29.
- [S5]. M.C.L. †, D.A.N. ‡, Y.K. †, et al. "Involvement of snapdragon benzaldehyde dehydrogenase in benzoic acid biosynthesis," *Plant Journal for Cell & Molecular Biology*, vol. 59, no. 2, pp. 256–265.
- [S6]. L.V.D. Fits and J. Memelink. "ORCA3, a jasmonate-responsive transcriptional regulator of plant primary and secondary metabolism," *Science*, vol. 289, no. 5477, pp. 295-297.
- [S7]. T. Unver, R.A. Groves, J.M. Hagel, et al. "Transcriptome Profiling of *Khat* (*Catha edulis*) and *Ephedra sinica* Reveals Gene Candidates Potentially Involved in Amphetamine-Type Alkaloid Biosynthesis," *Plos One*, vol. 10, no. 3, p. e0119701.
- [S8]. G.H. Zhang, N.H. Jiang, W.L. Song, C.H. Ma, S.C. Yang, and J.W. Chen. "De novo Sequencing and Transcriptome Analysis of *Pinellia ternata* Identify the Candidate Genes Involved in the Biosynthesis of Benzoic Acid and Ephedrine," *Front Plant Sci*, vol. 7, p. 1209.
